# Supplementary material
Source: Springer Nature journal article supplement (https://www.springerprofessional.de/resource/supplementary/13638_2013_894_MOESM3_ESM.pdf/11899122)
Supplement: MOESM3 [file 11899122]

## Next- hop selection in CAIR

Procedure 2 : Next- hop Selection

Inputs : position and speed of the neighbors

Outputs : the optimal next- hop forwarding node

Begin

do

if ( $N_{\text{intersection\_node}} \in N_{\text{neighboring\_node}}$ )

if ( $D_{\text{forwarding\_road\_segment}} = D_{\text{current\_road\_segment}}$ )

forward packet to its farthest  $N_{\text{neighboring\_node}}$ ;

else

forward to the  $N_{\text{intersection\_node}}$ ;

else

forward the packet directly to its farthest  $N_{\text{neighboring\_node}}$ ;

while(forwarding node is not destination node);

forward packet to destination node;

end if

end if

end while

End of Next- hop Selection
